# Supplementary material for: Bacterial Communities Associated with Host-Adapted Populations of Pea Aphids Revealed by Deep Sequencing of 16S Ribosomal DNA
Source: PLoS One. 2015 Mar 25;10(3):e0120664. doi: 10.1371/journal.pone.0120664 (PMC4373712; doi:10.1371/journal.pone.0120664)
Supplement: S1 Table — (XLSX) [file pone.0120664.s001.xlsx]

## Sheet: Feuil1
Phylum	Class	Order	Family	Genus	Read count	Percentage
Actinobacteria	Actinobacteria	Actinomycetales	Corynebacteriaceae	Corynebacterium	11	0.008%
Actinobacteria	Actinobacteria	Actinomycetales	Microbacteriaceae	Microbacterium	6	0.004%
Actinobacteria	Actinobacteria	Actinomycetales	Propionibacteriaceae	Propionibacterium	161	0.117%
Firmicutes	Bacilli	Bacillales	Paenibacillaceae	Paenibacillus	48	0.035%
Firmicutes	Bacilli	Lactobacillales	Lactobacillaceae	Lactobacillus	135	0.097%
Proteobacteria	Alphaproteobacteria	Rhizobiales	Bradyrhizobiaceae	Bradyrhizobium	6	0.004%
Proteobacteria	Alphaproteobacteria	Rhizobiales	Phyllobacteriaceae	Mesorhizobium	74	0.053%
Proteobacteria	Alphaproteobacteria	Rickettsiales	Rickettsiaceae	Rickettsia	34625	24.992%
Proteobacteria	Alphaproteobacteria	Rickettsiales	Rickettsiaceae	Wolbachia	209	0.151%
Proteobacteria	Betaproteobacteria	Burkholderiales	Burkholderiaceae	Cupriavidus	17	0.012%
Proteobacteria	Betaproteobacteria	Burkholderiales	Burkholderiaceae	Ralstonia	551	0.398%
Proteobacteria	Gammaproteobacteria	Enterobacteriales	Enterobacteriaceae	Buchnera	29225	21.095%
Proteobacteria	Gammaproteobacteria	Enterobacteriales	Enterobacteriaceae	Erwinia	578	0.417%
Proteobacteria	Gammaproteobacteria	Enterobacteriales	Enterobacteriaceae	Hamiltonella	2363	1.706%
Proteobacteria	Gammaproteobacteria	Enterobacteriales	Enterobacteriaceae	Pantoea	490	0.354%
Proteobacteria	Gammaproteobacteria	Enterobacteriales	Enterobacteriaceae	Regiella	1177	0.849%
Proteobacteria	Gammaproteobacteria	Enterobacteriales	Enterobacteriaceae	Serratia	1608	1.161%
Proteobacteria	Gammaproteobacteria	Legionellales	Coxiellaceae	Rickettsiella	442	0.319%
Proteobacteria	Gammaproteobacteria	Pseudomonadales	Pseudomonadaceae	Pseudomonas	34	0.025%
Proteobacteria	Gammaproteobacteria	Xanthomonadales	Xanthomonadaceae	Xanthomonas	35	0.025%
Tenericutes	Mollicutes	Entomoplasmatales	Spiroplasmataceae	Spiroplasma	66744	48.178%

## Sheet: Feuil2
			0.00794000245418258%
			0.00433091042955413%
			0.116212763193036%
			0.0346472834364331%
			0.097445484664968%
			0.00433091042955413%
			0.053414561964501%
			24.992962270552%
			0.150860046629469%
			0.0122709128837367%
			0.397721941114055%
			21.0951428839533%
			0.417211038047048%
			1.7056568908394%
			0.353691018413588%
			0.849580262597536%
			1.16068399512051%
			0.319043734977154%
			0.0245418257674734%
			0.0252636441723991%
			48.1770476183602%
