# Supplementary material for: Bacterial Communities Associated with Host-Adapted Populations of Pea Aphids Revealed by Deep Sequencing of 16S Ribosomal DNA
Source: PLoS One. 2015 Mar 25;10(3):e0120664. doi: 10.1371/journal.pone.0120664 (PMC4373712; doi:10.1371/journal.pone.0120664)
Supplement: S2 Table — (XLSX) [file pone.0120664.s002.xlsx]

## Sheet: Feuil1
	Msat-1	Msat-2	Psat-1	Psat-2	Tpra-1	Tpra-2	Mlup	Malb	Lpra	Csco	Svar
Msat-2	0.166667	-	-	-	-	-	-	-	-	-	-
Psat-1	0.538462	0.466667	-	-	-	-	-	-	-	-	-
Psat-2	0.5	0.333333	0.368421	-	-	-	-	-	-	-	-
Tpra-1	0.571429	0.5	0.529412	0.6		-	-	-	-	-	-
Tpra-2	0.333333	0.272727	0.5	0.6	0.384615	-	-	-	-	-	-
Mlup	0.5	0.6	0.454545	0.571429	0.666667	0.428571	-	-	-	-	-
Malb	0.333333	0.454545	0.833333	0.6	0.692308	0.5	0.714286	-	-	-	-
Lpra	0.333333	0.454545	0.5	0.6	0.538462	0.25	0.142857	0.5	-	-	-
Csco	0.625	0.555556	0.368421	0.363636	0.5	0.6	0.571429	0.733333	0.6	-	-
Svar	0.75	0.8	0.636364	0.714286	0.666667	0.714286	0.666667	0.714286	0.714286	0.714286	-
Ospi	0.6	0.666667	0.538462	0.625	0.714286	0.777778	0.5	0.555556	0.555556	0.5	0.75
