# Supplementary material for: Bacterial Communities Associated with Host-Adapted Populations of Pea Aphids Revealed by Deep Sequencing of 16S Ribosomal DNA
Source: PLoS One. 2015 Mar 25;10(3):e0120664. doi: 10.1371/journal.pone.0120664 (PMC4373712; doi:10.1371/journal.pone.0120664)
Supplement: S3 Table — Numbers and percentages of 16S rDNA reads are given for each taxon. (XLSX) [file pone.0120664.s003.xlsx]

## Sheet: seqids
Sequence type	Accession number
Msat-1_Buchnera	KP265043
Msat-1_Hamiltonella_defensa	KP265044
Msat-1_Rickettsiella	KP265045
Msat-1_Spiroplasma_sp.	KP265046
Msat-2_Buchnera	KP265047
Msat-2_Hamiltonella_defensa	KP265048
Msat-2_Ralstonia	KP265049
Msat-2_Regiella_insecticola	KP265050
Msat-2_Rickettsiella	KP265051
Msat-2_Spiroplasma_sp.	KP265052
Psat-2_Buchnera	KP265053
Psat-2_Propionibacterium	KP265054
Psat-2_Ralstonia	KP265055
Psat-2_Rickettsia	KP265056
Psat-2_Rickettsiella	KP265057
Psat-2_Serratia_entomophila	KP265058
Psat-2_Spiroplasma_sp.	KP265059
Psat-2_Xanthomonas	KP265060
Psat-1_Buchnera	KP265061
Psat-1_Erwinia	KP265062
Psat-1_Hamiltonella_defensa	KP265063
Psat-1_Paenibacillus	KP265064
Psat-1_Pantoea_ananatis	KP265065
Psat-1_Pseudomonas	KP265066
Psat-1_Ralstonia	KP265067
Psat-1_Rickettsia	KP265068
Psat-1_Rickettsiella	KP265069
Psat-1_Serratia_entomophila	KP265070
Psat-1_Spiroplasma_sp.	KP265071
Tprat-1_Bradyrhizobium	KP265072
Tprat-1_Buchnera	KP265073
Tprat-1_Erwinia	KP265074
Tprat-1_Microbacterium	KP265075
Tprat-1_Propionibacterium	KP265076
Tprat-1_Ralstonia	KP265077
Tprat-1_Regiella_insecticola	KP265078
Tprat-1_Spiroplasma_sp.	KP265079
Tprat-1_Wolbachia	KP265080
Tprat-2_Buchnera	KP265081
Tprat-2_Ralstonia	KP265082
Tprat-2_Regiella_insecticola	KP265083
Tprat-2_Spiroplasma_sp.	KP265084
Mlup_Buchnera	KP265085
Mlup_Rickettsia	KP265086
Mlup_Spiroplasma_sp.	KP265087
Malb_Buchnera	KP265088
Malb_Hamiltonella_defensa	KP265089
Malb_Pseudomonas	KP265090
Malb_Regiella_insecticola	KP265091
Lpra_Buchnera	KP265092
Lpra_Regiella_insecticola	KP265093
Lpra_Rickettsia	KP265094
Msat-2_Pantoea_ananatis	KP265095
Lpra_Spiroplasma_sp.	KP265096
Csco_Buchnera	KP265097
Csco_Erwinia	KP265098
Csco_Cupriavidus	KP265099
Csco_Hamiltonella_defensa	KP265100
Csco_Lactobacillus	KP265101
Csco_Mesorhizobium	KP265102
Csco_Propionibacterium	KP265103
Csco_Ralstonia	KP265104
Csco_Rickettsia	KP265105
Csco_Serratia_entomophila	KP265106
Csco_Spiroplasma_sp.	KP265107
Svar_Buchnera	KP265108
Svar-1_Serratia_entomophila	KP265109
Svar-2_Serratia_entomophila	KP265110
Svar_Wolbachia	KP265111
Ospi_Buchnera	KP265112
Ospi_Corynebacterium	KP265113
Ospi_Hamiltonella_defensa	KP265114
Ospi_Propionibacterium	KP265115
Ospi_Rickettsia	KP265116
